# Supplementary material
Source: Springer Nature journal article supplement (https://www.springermedizin.de/resource/supplementary/13046_2008_119_MOESM1_ESM.pdf/9661672)

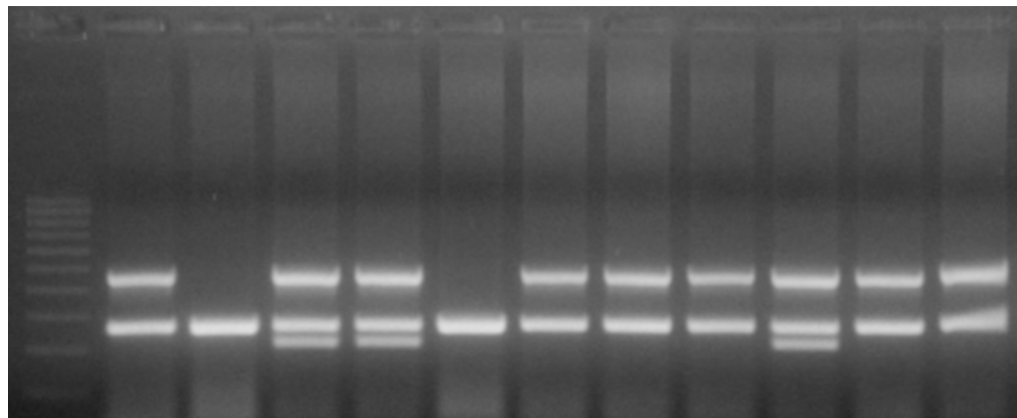

480 bp  
268 bp  
215 bp

L 1 2 3 4 5 6 7 8 9 10 11

Supplement: MOESM1 [file 9661672]
